# Supplementary material for: Digital Finance and Financial Statement Comparability: Evidence from China
Source: Research Square preprint supplement (doi:10.21203/rs.3.rs-7103298/v1), 2025-09-16
Supplement: Supplementary file 1 [file 4538741e97b52bc090b941ae.docx]

| **Table 1 Summary statistics** | | | | | |
| --- | --- | --- | --- | --- | --- |
| **Variables** | **Obs** | **Mean** | **Std.Dev.** | **Min** | **Max** |
| *FSC4* | 18,369 | -0.410 | 1.152 | -12.756 | 0.000 |
| *FSC10* | 18,369 | -0.563 | 1.343 | -14.645 | 0.000 |
| *FSCInd* | 18,369 | -1.334 | 1.756 | -17.809 | 0.000 |
| *DFI* | 18,369 | 5.197 | 0.667 | 2.786 | 6.068 |
| *DFI_BC* | 18,369 | 5.066 | 0.791 | 0.673 | 5.984 |
| *DFI_DU* | 18,369 | 5.100 | 0.604 | 1.911 | 6.192 |
| *Size* | 18,369 | 22.463 | 1.289 | 19.068 | 25.81 |
| *Lev* | 18,369 | 0.455 | 0.206 | 0.053 | 1.226 |
| *OFC* | 18,369 | 0.045 | 0.069 | -0.199 | 0.261 |
| *ROA* | 18,369 | 0.031 | 0.067 | -0.412 | 0.205 |
| *SG* | 18,369 | 0.336 | 7.480 | -0.982 | 821.786 |
| *FRQ* | 18,369 | -0.094 | 0.317 | -15.691 | 0.000 |
| *CI* | 18,369 | 0.223 | 0.170 | 0.001 | 0.736 |
| *AGE* | 18,369 | 2.372 | 0.610 | 0.000 | 3.219 |
| *MTB* | 18,369 | 4.111 | 3.270 | -1.331 | 30.700 |
| *RetV* | 18,369 | 0.381 | 0.032 | 0.342 | 0.433 |
| *Big4* | 18,369 | 0.067 | 0.250 | 0.000 | 1.000 |
| *SOE* | 18,369 | 0.449 | 0.497 | 0.000 | 1.000 |
| ***Note:*** *This table provides summary statistics of variables from 20112019. All the continuous variables are winsorized at the 1% and 99% levels to mitigate the effect of outliers*. | | | | | |

| **Table 2 Pearson’s correlation results** | | | | | | | | | | |
| --- | --- | --- | --- | --- | --- | --- | --- | --- | --- | --- |
|  | (1) | (2) | (3) | (4) | (5) | (6) | (7) | (8) | (9) | (10) |
| *1)FSC4* | 1 |  |  |  |  |  |  |  |  |  |
| *2)FSC10* | 0.993*** | 1 |  |  |  |  |  |  |  |  |
| *3)FSCInd* | 0.922*** | 0.944*** | 1 |  |  |  |  |  |  |  |
| *4)DFI* | 0.184*** | 0.223*** | 0.374*** | 1 |  |  |  |  |  |  |
| *5)DFI_BC* | 0.181*** | 0.221*** | 0.374*** | 0.990*** | 1 |  |  |  |  |  |
| *6)DFI_DU* | 0.180*** | 0.218*** | 0.373*** | 0.970*** | 0.959*** | 1 |  |  |  |  |
| *7)Size* | 0.052*** | 0.053*** | 0.060*** | 0.167*** | 0.173*** | 0.169*** | 1 |  |  |  |
| *8)Lev* | -0.164*** | -0.166*** | -0.170*** | -0.071*** | -0.063*** | -0.067*** | 0.472*** | 1 |  |  |
| *9)OFC* | 0.029*** | 0.021*** | 0.013* | 0.049*** | 0.051*** | 0.041*** | 0.075*** | -0.154*** | 1 |  |
| *10)ROA* | 0.079*** | 0.069*** | 0.031*** | -0.081*** | -0.085*** | -0.068*** | 0.075*** | -0.311*** | 0.341*** | 1 |
| *11)SG* | -0.012* | -0.011 | -0.014* | -0.013* | -0.014* | -0.016** | 0.032*** | 0.030*** | -0.010 | 0.014** |
| *12)FRQ* | 0.033*** | 0.034*** | 0.036*** | 0.025*** | 0.025*** | 0.026*** | -0.007 | -0.031*** | 0.037*** | -0.018** |
| *13)CI* | -0.070*** | -0.076*** | -0.065*** | -0.102*** | -0.102*** | -0.102*** | 0.052*** | 0.035*** | 0.259*** | -0.040*** |
| *14)AGE* | -0.086*** | -0.083*** | -0.056*** | 0.200*** | 0.218*** | 0.208*** | 0.299*** | 0.276*** | 0.010 | -0.049*** |
| *15)MTB* | -0.23*** | -0.230*** | -0.251*** | -0.064*** | -0.078*** | -0.090*** | -0.164*** | 0.317*** | -0.063*** | -0.113*** |
| *16)RetV* | 0.017** | 0.025*** | 0.024*** | 0.224*** | 0.157*** | 0.191*** | 0.023*** | -0.044*** | 0.004 | 0.001 |
| *17)Big4* | -0.002 | -0.004 | -0.012* | -0.010 | -0.008 | -0.009 | 0.351*** | 0.104*** | 0.084*** | 0.058*** |
| *18)SOE* | -0.076*** | -0.083*** | -0.091*** | -0.112*** | -0.105*** | -0.104*** | 0.294*** | 0.245*** | 0.009 | -0.007 |
|  | (9) | (10) | (11) | (12) | (13) | (14) | (15) | (16) | (17) | (18) |
| *9)OFC* | 1 |  |  |  |  |  |  |  |  |  |
| *10)ROA* | 0.341*** | 1 |  |  |  |  |  |  |  |  |
| *11)SG* | -0.010 | 0.014** | 1 |  |  |  |  |  |  |  |
| *12)FRQ* | 0.037*** | -0.018** | -0.389*** | 1 |  |  |  |  |  |  |
| *13)CI* | 0.259*** | -0.040*** | -0.020*** | 0.057*** | 1 |  |  |  |  |  |
| *14)AGE* | 0.010 | -0.049*** | 0.010 | -0.015** | 0.0318*** | 1 |  |  |  |  |
| *15)MTB* | -0.063*** | -0.113*** | 0.017** | -0.039*** | -0.082*** | 0.053*** | 1 |  |  |  |
| *16)RetV* | 0.004 | 0.0005 | 0.012* | -0.017** | -0.018** | 0.002 | 0.157*** | 1 |  |  |
| *17)Big4* | 0.084*** | 0.058*** | 0.002 | 0.011 | 0.044*** | 0.077*** | -0.038*** | -0.006 | 1 |  |
| *18)SOE* | 0.009 | -0.007 | -0.017** | 0.030*** | 0.185*** | 0.412*** | -0.006 | -0.043*** | 0.146*** | 1 |
| ***Note:*** *This table providescorrelation coefficients of variables.*  ****, **, and * represent significance at 1%, 5%, and 10%, respectively.* | | | | | | | | | | |

| **Table 3 Digital finance and financial statement comparability** | | | | | | | | | |
| --- | --- | --- | --- | --- | --- | --- | --- | --- | --- |
|  | **(1)** | **(2)** | **(3)** | **(4)** | **(5)** | **(6)** | **(7)** | **(8)** | **(9)** |
| **VARIABLES** | **FSC4** | **FSC10** | **FSCInd** | **FSC4** | **FSC10** | **FSCInd** | **FSC4** | **FSC10** | **FSCInd** |
| *DFI* | 0.0024*** | 0.0034*** | 0.0084*** |  |  |  |  |  |  |
|  | (4.1624) | (5.1663) | (45.9704) |  |  |  |  |  |  |
| *DFI_BC* |  |  |  | 0.0026*** | 0.0038*** | 0.0076*** |  |  |  |
|  |  |  |  | (3.0135) | (3.8158) | (47.1842) |  |  |  |
| *DFI_DU* |  |  |  |  |  |  | 0.0026*** | 0.0038*** | 0.0091*** |
|  |  |  |  |  |  |  | (13.0767) | (16.4461) | (32.1692) |
| *Size* | 0.0657*** | 0.0687*** | 0.0457** | 0.0664*** | 0.0697*** | 0.0470** | 0.0717*** | 0.0770*** | 0.0605** |
|  | (4.4595) | (4.0529) | (2.2261) | (4.4935) | (4.0961) | (2.2895) | (3.4828) | (3.2067) | (2.0162) |
| *Lev* | -0.5192*** | -0.5800*** | -0.6144*** | -0.5250*** | -0.5879*** | -0.6328*** | -0.5583*** | -0.6342*** | -0.7194*** |
|  | (-4.8451) | (-4.7027) | (-4.1687) | (-4.8755) | (-4.7433) | (-4.2905) | (-4.3950) | (-4.2938) | (-3.9899) |
| *OFC* | -0.0525 | -0.2184 | -0.6841** | -0.0536 | -0.2198 | -0.7058*** | -0.0005 | -0.1444 | -0.5333 |
|  | (-0.2662) | (-0.9635) | (-2.5193) | (-0.2714) | (-0.9686) | (-2.5965) | (-0.0019) | (-0.5020) | (-1.5504) |
| *ROA* | 0.6118** | 0.6917** | 0.5818 | 0.6088** | 0.6877** | 0.5952 | 0.5063* | 0.5436* | 0.2908 |
|  | (2.3103) | (2.2821) | (1.5811) | (2.2996) | (2.2689) | (1.6175) | (1.8049) | (1.6738) | (0.7142) |
| *SG* | 0.0002 | 0.0006 | 0.0006 | 0.0002 | 0.0006 | 0.0006 | 0.0002 | 0.0006 | 0.0007 |
|  | (0.1818) | (0.4812) | (0.3837) | (0.1851) | (0.4879) | (0.4133) | (0.2057) | (0.5163) | (0.4999) |
| *FRQ* | 0.0833** | 0.0994** | 0.1036* | 0.0843** | 0.1008** | 0.1069* | 0.0840* | 0.1003* | 0.1039 |
|  | (2.0089) | (2.0653) | (1.7822) | (2.0367) | (2.0989) | (1.8551) | (1.7813) | (1.8341) | (1.6091) |
| *CI* | -0.3210*** | -0.3583*** | -0.1393 | -0.3211*** | -0.3585*** | -0.1304 | -0.3313*** | -0.3719*** | -0.1563 |
|  | (-4.7415) | (-4.6298) | (-1.5071) | (-4.7374) | (-4.6272) | (-1.4088) | (-2.6783) | (-2.6111) | (-0.9194) |
| *AGE* | -0.1981*** | -0.2412*** | -0.3415*** | -0.2004*** | -0.2443*** | -0.3582*** | -0.1943*** | -0.2363*** | -0.3408*** |
|  | (-12.4411) | (-13.0888) | (-15.3289) | (-12.5970) | (-13.2646) | (-15.9894) | (-6.8913) | (-7.1749) | (-8.4341) |
| *MTB* | -0.0607*** | -0.0708*** | -0.1008*** | -0.0605*** | -0.0706*** | -0.0996*** | -0.0590*** | -0.0683*** | -0.0946*** |
|  | (-6.6470) | (-6.9684) | (-8.8204) | (-6.6065) | (-6.9226) | (-8.7061) | (-4.4339) | (-4.6620) | (-5.8814) |
| *RETV* | 0.0173 | -0.0572 | -1.9263*** | 0.4601 | 0.5846* | -0.5012 | 0.2458 | 0.2600 | -1.2537*** |
|  | (0.0660) | (-0.1904) | (-5.1181) | (1.5826) | (1.7626) | (-1.3186) | (0.9033) | (0.8491) | (-3.5185) |
| *Big4* | -0.0708** | -0.0700* | -0.0799 | -0.0718** | -0.0714* | -0.0823 | -0.0769 | -0.0784 | -0.0941 |
|  | (-2.0288) | (-1.7418) | (-1.5676) | (-2.0533) | (-1.7712) | (-1.6109) | (-1.1269) | (-0.9812) | (-0.8975) |
| *SOE* | -0.0129 | -0.0161 | 0.0217 | -0.0135 | -0.0169 | 0.0231 | -0.0197 | -0.0251 | 0.0093 |
|  | (-0.6427) | (-0.6937) | (0.7527) | (-0.6713) | (-0.7285) | (0.8000) | (-0.4910) | (-0.5383) | (0.1612) |
| *Year/Ind* | Yes | Yes | Yes | Yes | Yes | Yes | Yes | Yes | Yes |
| *Constant* | -4.4953 | -9.1840 | -2.0294*** | 25.4687 | 38.6717 | -2.2893*** | -1.6574*** | -1.9971*** | -2.5350*** |
|  | (-0.1372) | (-0.2421) | (-5.2809) | (0.4594) | (0.6027) | (-5.9499) | (-4.4990) | (-4.6427) | (-4.6956) |
| *N* | 18,369 | 18,369 | 18,369 | 18,369 | 18,369 | 18,369 | 18,369 | 18,369 | 18,369 |
| *R2* | 0.1084 | 0.1238 | 0.2159 | 0.1078 | 0.1229 | 0.2138 | 0.1058 | 0.1204 | 0.2103 |
| ***Note:*** *This table reports the OLS results on the effect of digital finance/fintech on comparability. Dependent variable is financial statement comparability taken from the model developed by Francis et al. (2014). The independent variable Columns (1)–(3), (4)–(6), and (7)–(9) are total digital finance index (DFI), breath of coverage index (DF_BC), and depth of usage index (DF_DU), respectively. T-values are shown in brackets. ***, **, and * represent significance at 1%, 5%, and 10%, respectively. Please refer to Appendix A for definitions of variables.* | | | | | | | | | |

| **Table 4 Using alternative proxies** | | | | | | | | | | |
| --- | --- | --- | --- | --- | --- | --- | --- | --- | --- | --- |
| **Panel A: Alternative proxy of digital finance** | | | | | | | | | | |
|  | | | | **(1)** | | | **(2)** | | **(3)** | |
| **VARIABLES** | | | | **FSC4** | | | **FSC10** | | **FSCInd** | |
| *DFI* | | | | 0.0019*** | | | 0.0027*** | | 0.0059*** | |
|  | | | | (13.2437) | | | (16.2332) | | (28.7502) | |
| *CV* | | | | Yes | | | Yes | | Yes | |
| *Year/Ind* | | | | Yes | | | Yes | | Yes | |
| *Constant* | | | | -1.4337*** | | | -1.7043*** | | -2.2024*** | |
|  | | | | (-3.8932) | | | (-3.9602) | | (-4.0412) | |
| *N* | | | | 18,369 | | | 18,369 | | 18,369 | |
| *R2* | | | | 0.1038 | | | 0.1157 | | 0.1760 | |
| Panel B: Alternative proxy of comparability | | | | | | | | | | |
|  | **(1)** | **(2)** | **(3)** | **(4)** | **(5)** | | **(6)** | **(7)** | **(8)** | **(9)** |
| **VARIABLES** | **FSC4_ADJ** | **FSC10_ADJ** | **FSCInd_ADJ** | **FSC4_ADJ** | | **FSC10_ADJ** | **FSCInd_ADJ** | **FSC4_ADJ** | **FSC10_ADJ** | **FSCInd_ADJ** |
| *DFI* | 0.0039*** | 0.0049*** | 0.0093*** |  | |  |  |  |  |  |
|  | (17.1998) | (19.8873) | (32.3175) |  | |  |  |  |  |  |
| *DFI_BC* |  |  |  | 0.0032*** | | 0.0044*** | 0.0085*** |  |  |  |
|  |  |  |  | (3.3719) | | (4.3071) | (32.4890) |  |  |  |
| *DFI_DU* |  |  |  |  | |  |  | 0.0041*** | 0.0052*** | 0.0101*** |
|  |  |  |  |  | |  |  | (5.2594) | (5.4661) | (5.2823) |
| *CV* | *Yes* | *Yes* | *Yes* | Yes | | Yes | Yes | Yes | Yes | Yes |
| *Year/Ind* | *Yes* | *Yes* | *Yes* | Yes | | Yes | Yes | Yes | Yes | Yes |
| *Constant* | -2.0323*** | -2.1710*** | -2.2811*** | -23.2043 | | -5.7646 | -2.5641*** | -2.3056* | -2.5123* | -2.8588 |
|  | (-4.3146) | (-4.2187) | (-3.8070) | (-0.3954) | | (-0.0913) | (-4.2879) | (-2.1746) | (-2.0520) | (-1.4326) |
| *N* | 18,369 | 18,369 | 18,369 | 18,369 | | 18,369 | 18,369 | 18,369 | 18,369 | 18,369 |
| *R2* | 0.1311 | 0.1439 | 0.2164 | 0.1306 | | 0.1432 | 0.2156 | 0.1279 | 0.1398 | 0.2109 |
| **Panel C: Alternative proxy of comparability** | | | | | | | | | | |
|  | **(1)** | **(2)** | **(3)** | **(4)** | | **(5)** | **(6)** | **(7)** | **(8)** | **(9)** |
| **VARIABLES** | **FSC4_Lag** | **FSC10_Lag** | **FSCInd_Lag** | **FSC4_Lag** | | **FSC10_Lag** | **FSCInd_Lag** | **FSC4_Lag** | **FSC10_Lag** | **FSCInd_Lag** |
| *DFI* | 0.0033*** | 0.0044*** | 0.0091*** |  | |  |  |  |  |  |
|  | (14.6082) | (17.6220) | (31.2138) |  | |  |  |  |  |  |
| *DFI_BC* |  |  |  | 0.0030*** | | 0.0040*** | 0.0083*** |  |  |  |
|  |  |  |  | (14.6374) | | (17.6586) | (31.4004) |  |  |  |
| *DFI_DU* |  |  |  |  | |  |  | 0.0036*** | 0.0048*** | 0.0099*** |
|  |  |  |  |  | |  |  | (5.2786) | (5.5826) | (5.3940) |
| *CV* | *Yes* | *Yes* | *Yes* | Yes | | Yes | Yes | Yes | Yes | Yes |
| *Year/Ind* | *Yes* | *Yes* | *Yes* | Yes | | Yes | Yes | Yes | Yes | Yes |
| *Constant* | -2.3884*** | -2.6021*** | -2.8851*** | -2.5009*** | | -2.7506*** | -3.1668*** | -2.6156** | -2.8972** | -3.4158 |
|  | (-4.9877) | (-4.9535) | (-4.7447) | (-5.2273) | | (-5.2410) | (-5.2152) | (-2.5859) | (-2.4554) | (-1.7678) |
| *N* | 18,369 | 18,369 | 18,369 | 18,369 | | 18,369 | 18,369 | 18,369 | 18,369 | 18,369 |
| *R2* | 0.1170 | 0.1312 | 0.2082 | 0.1165 | | 0.1304 | 0.2071 | 0.1151 | 0.1286 | 0.2051 |
| *Note****:*** *This table reports the OLS results on the effect of digital finance/fintech on comparability by using alternative proxies for digital finance/fintech and comparability. T-values are shown in brackets. ***, **, and * represent significance at 1%, 5%, and 10%, respectively. Please refer to Appendix A for definitions of variables.* | | | | | | | | | | |

| **Table 5 Using alternative methodologies** | | | | | | | | | |
| --- | --- | --- | --- | --- | --- | --- | --- | --- | --- |
| **Panel A: Interaction term between year and industry** | | | | | | | | | |
|  | **(1)** | **(2)** | **(3)** | **(4)** | **(5)** | **(6)** | **(7)** | **(8)** | **(9)** |
| **VARIABLES** | **FSC4** | **FSC10** | **FSCInd** | **FSC4** | **FSC10** | **FSCInd** | **FSC4** | **FSC10** | **FSCInd** |
| *DFI* | 0.0024*** | 0.0035*** | 0.0092*** |  |  |  |  |  |  |
|  | (4.2193) | (5.2340) | (25.2793) |  |  |  |  |  |  |
| *DFI_BC* |  |  |  | 0.0027*** | 0.0039*** | 0.0089*** |  |  |  |
|  |  |  |  | (3.0646) | (3.8767) | (25.6821) |  |  |  |
| *DFI_DU* |  |  |  |  |  |  | 0.0027*** | 0.0039*** | 0.0089*** |
|  |  |  |  |  |  |  | (8.5683) | (10.6331) | (19.7896) |
| *CV* | Yes | Yes | Yes | Yes | Yes | Yes | Yes | Yes | Yes |
| *Year/Industry* | Yes | Yes | Yes | Yes | Yes | Yes | Yes | Yes | Yes |
| *Year*Industry* | Yes | Yes | Yes | Yes | Yes | Yes | Yes | Yes | Yes |
| *Constant* | -53.9736 | -74.4016* | -2.2032*** | -22.7070 | -24.7507 | -2.5769*** | -1.6839*** | -2.0293*** | -2.4847*** |
|  | (-1.4996) | (-1.7786) | (-5.6171) | (-0.3949) | (-0.3713) | (-6.5232) | (-4.3382) | (-4.4898) | (-4.4024) |
| *N* | 18,369 | 18,369 | 18,369 | 18,369 | 18,369 | 18,369 | 18,369 | 18,369 | 18,369 |
| *R2* | 0.1092 | 0.1248 | 0.2154 | 0.1085 | 0.1239 | 0.2147 | 0.1058 | 0.1204 | 0.2104 |
| **Panel B: Fixed Effect Model** | | | | | | | | | |
|  | **(1)** | **(2)** | **(3)** | **(4)** | **(5)** | **(6)** | **(7)** | **(8)** | **(9)** |
| **VARIABLES** | **FSC4** | **FSC10** | **FSCInd** | **FSC4** | **FSC10** | **FSCInd** | **FSC4** | **FSC10** | **FSCInd** |
| *DFI* | 0.0022*** | 0.0032*** | 0.0071*** |  |  |  |  |  |  |
|  | (6.5902) | (8.2717) | (32.0301) |  |  |  |  |  |  |
| *DFI_BC* |  |  |  | 0.0022*** | 0.0034*** | 0.0066*** |  |  |  |
|  |  |  |  | (4.2583) | (5.6106) | (31.1229) |  |  |  |
| *DFI_DU* |  |  |  |  |  |  | 0.0026*** | 0.0036*** | 0.0074*** |
|  |  |  |  |  |  |  | (16.0808) | (19.5214) | (31.8239) |
| *Year FE/Firm FE* | Yes | Yes | Yes | Yes | Yes | Yes | Yes | Yes | Yes |
| *Constant* | -31.0694 | -34.0935 | -6.4197*** | -17.9993 | -4.6457 | -6.5463*** | -2.8670*** | -3.6762*** | -7.3537*** |
|  | (-1.4027) | (-1.3310) | (-11.8465) | (-0.5105) | (-0.1139) | (-12.0337) | (-7.9321) | (-8.7909) | (-13.8690) |
| *N* | 18,369 | 18,369 | 18,369 | 18,369 | 18,369 | 18,369 | 18,369 | 18,369 | 18,369 |
| *R2* | 0.0729 | 0.1032 | 0.2530 | 0.0714 | 0.1011 | 0.2504 | 0.0701 | 0.0996 | 0.2524 |
| **Panel C: Dynamic Effect** | | | | | | | | | |
|  | **(1)** | **(2)** | **(3)** | **(4)** | **(5)** | **(6)** | **(7)** | **(8)** | **(9)** |
| **VARIABLES** | **FSC4** | **FSC10** | **FSCInd** | **FSC4** | **FSC10** | **FSCInd** | **FSC4** | **FSC10** | **FSCInd** |
| *L.DFI* | 0.0017*** |  |  |  |  |  |  |  |  |
|  | (2.6875) |  |  |  |  |  |  |  |  |
| *L.DFI_BC* |  | 0.0018* |  |  |  |  |  |  |  |
|  |  | (1.8067) |  |  |  |  |  |  |  |
| *L.DFI_DU* |  |  | 0.0023*** |  |  |  |  |  |  |
|  |  |  | (12.9834) |  |  |  |  |  |  |
| *L2.DFI* |  |  |  | 0.0024*** |  |  |  |  |  |
|  |  |  |  | (3.7905) |  |  |  |  |  |
| *L2.DFI_BC* |  |  |  |  | 0.0016*** |  |  |  |  |
|  |  |  |  |  | (12.5035) |  |  |  |  |
| *L2.DFI_DU* |  |  |  |  |  | 0.0016*** |  |  |  |
|  |  |  |  |  |  | (9.9400) |  |  |  |
| *L3.DFI* |  |  |  |  |  |  | 0.0011 |  |  |
|  |  |  |  |  |  |  | (0.8741) |  |  |
| *L3.DFI_BC* |  |  |  |  |  |  |  | 0.0008 |  |
|  |  |  |  |  |  |  |  | (0.7121) |  |
| *L3.DFI_DU* |  |  |  |  |  |  |  |  | -0.0003 |
|  |  |  |  |  |  |  |  |  | (-1.0114) |
| *Year/Ind* | Yes | Yes | Yes | Yes | Yes | Yes | Yes | Yes | Yes |
| *Constant* | -22.1000 | -9.2360 | -1.6091*** | 47.4475 | -0.6739** | -0.8393** | -2.0595 | -2.5354 | -117.9630*** |
|  | (-0.5553) | (-0.1397) | (-4.4997) | (1.1488) | (-2.4520) | (-2.4420) | (-1.1349) | (-1.6167) | (-5.1010) |
| *N* | 18,369 | 18,369 | 18,369 | 16,171 | 16,171 | 16,171 | 14,116 | 14,116 | 14,116 |
| *R2* | 0.0937 | 0.0932 | 0.0943 | 0.0819 | 0.0807 | 0.0783 | 0.0782 | 0.0782 | 0.0639 |
| **Panel D: Systematic GMM** | | | | | | | | | |
|  | **(1)** | **(2)** | **(3)** | **(4)** | **(5)** | **(6)** | **(7)** | **(8)** | **(9)** |
| **VARIABLES** | **FSC4** | **FSC10** | **FSCInd** | **FSC4** | **FSC10** | **FSCInd** | **FSC4** | **FSC10** | **FSCInd** |
| *DFI* | 0.0006*** | 0.0010*** | 0.0028*** |  |  |  |  |  |  |
|  | (5.8619) | (7.7277) | (18.8368) |  |  |  |  |  |  |
| *DFI_BC* |  |  |  | 0.0006*** | 0.0007*** | 0.0016*** |  |  |  |
|  |  |  |  | (5.2047) | (6.0579) | (11.0144) |  |  |  |
| *DFI_DU* |  |  |  |  |  |  | 0.0007*** | 0.0009*** | 0.0035*** |
|  |  |  |  |  |  |  | (5.7617) | (7.2304) | (21.2420) |
| *L.FSC4* | 0.4241*** |  |  | 0.4100*** |  |  | 0.4093*** |  |  |
|  | (102.4369) |  |  | (91.2752) |  |  | (92.4305) |  |  |
| *L.FSC10* |  | 0.4342*** |  |  | 0.4385*** |  |  | 0.4357*** |  |
|  |  | (106.0033) |  |  | (113.8171) |  |  | (112.8401) |  |
| *L.FSCInd* |  |  | 0.4338*** |  |  | 0.4415*** |  |  | 0.4009*** |
|  |  |  | (102.5352) |  |  | (105.6580) |  |  | (98.5585) |
| *Year/Industry* | Yes | Yes | Yes | Yes | Yes | Yes | Yes | Yes | Yes |
| *Constant* | -1.4467*** | -1.9488*** | -2.7074*** | -1.7409*** | -1.8359*** | -2.6687*** | -1.6216*** | -1.9101*** | -2.5474*** |
|  | (-5.8547) | (-6.6201) | (-11.6689) | (-6.1279) | (-7.0268) | (-11.2601) | (-5.8743) | (-7.2315) | (-10.6581) |
| ***Diagnostic Tests*** |  |  |  |  |  |  |  |  |  |
| *Ar(1)* | -4.70*** | -4.70*** | -5.62*** | -4.62*** | -4.69*** | -5.49*** | -4.64*** | -4.72*** | -5.72*** |
| *Ar(2)* | 1.64 | 1.51 | 1.64 | 1.58 | 1.52 | 1.60 | 1.62 | 1.57 | 1.58 |
| *N* | 16,171 | 16,171 | 16,171 | 16,171 | 16,171 | 16,171 | 16,171 | 16,171 | 16,171 |
| **Panel E: 2SLS** | | | | | | | | | |
|  | **(1)** | **(2)** | **(3)** | **(4)** | **(5)** | **(6)** | **(7)** | **(8)** | **(9)** |
| **VARIABLES** | **FSC4** | **FSC10** | **FSCInd** | **FSC4** | **FSC10** | **FSCInd** | **FSC4** | **FSC10** | **FSCInd** |
| *DF*I | 0.3109*** | 0.4247*** | 0.9480*** |  |  |  |  |  |  |
|  | (2.8006) | (3.2662) | (5.6527) |  |  |  |  |  |  |
| *DFI_BC* |  |  |  | 0.1989*** | 0.2720*** | 0.6058*** |  |  |  |
|  |  |  |  | (2.8155) | (3.2872) | (5.6769) |  |  |  |
| *DFI_DU* |  |  |  |  |  |  | 0.4468*** | 0.6093*** | 1.3648*** |
|  |  |  |  |  |  |  | (2.7764) | (3.2319) | (5.6131) |
| *CV* | Yes | Yes | Yes | Yes | Yes | Yes | Yes | Yes | Yes |
| *Year/Industry* | Yes | Yes | Yes | Yes | Yes | Yes | Yes | Yes | Yes |
| *Constant* | -2.5280*** | -3.2733*** | -5.6209*** | -2.3204*** | -2.9894*** | -4.9884*** | -2.8355*** | -3.6925*** | -6.5604*** |
|  | (-8.9862) | (-10.0302) | (-13.7990) | (-8.0451) | (-8.9208) | (-11.8734) | (-9.2719) | (-10.4078) | (-14.7903) |
| *N* | 18,369 | 18,369 | 18,369 | 18,369 | 18,369 | 18,369 | 18,369 | 18,369 | 18,369 |
| *R2* | 0.0861 | 0.0890 | 0.1021 | 0.0861 | 0.0890 | 0.1021 | 0.0861 | 0.0890 | 0.1021 |
| ***Note:*** *This table reports on the effect of digital f finance/fintech on comparability by using different methods. In Panel A, following Moser and Voena (2012) and Ji et al. (2022), the interaction terms between year-industry dummies are included. Panel B reports the results of fixed effect model. Panel C reports the results of dynamic effect. Panel D reports the results of GMM. Panel E reports the results of 2SLS. T-values are shown in brackets. ***, **, and * represent significance at 1%, 5%, and 10%, respectively. Please refer to Appendix A for definitions of variables.* | | | | | | | | | |

| Table 6 Mechanism for digital finance to financial statement comparability | | | | | | | | | | | | |
| --- | --- | --- | --- | --- | --- | --- | --- | --- | --- | --- | --- | --- |
|  | **(1)** | **(2)** | **(3)** | **(4)** | **(5)** | **(6)** | **(7)** | **(8)** | **(9)** | **(10)** | **(11)** | **(12)** |
| **VARIABLES** | **AQ** | **FSC4** | **FSC10** | **FSCInd** | **AQ** | **FSC4** | **FSC10** | **FSCInd** | **AQ** | **FSC4** | **FSC10** | **FSCInd** |
| *DFI* | 0.0001*** | 0.0024*** | 0.0036*** | 0.0084*** |  |  |  |  |  |  |  |  |
|  | (2.8133) | (19.3091) | (24.2483) | (45.9663) |  |  |  |  |  |  |  |  |
| *DFI_BC* |  |  |  |  | 0.0001*** | 0.0022*** | 0.0032*** | 0.0076*** |  |  |  |  |
|  |  |  |  |  | (2.9100) | (19.6495) | (24.7093) | (47.1810) |  |  |  |  |
| *DFI_DU* |  |  |  |  |  |  |  |  | 0.0001*** | 0.0026*** | 0.0038*** | 0.0091*** |
|  |  |  |  |  |  |  |  |  | (2.8443) | (18.3582) | (23.2818) | (45.5014) |
| *AQ* |  | 0.0833** | 0.0994** | 0.1036* |  | 0.0844** | 0.1009** | 0.1069* |  | 0.0840** | 0.1003** | 0.1039* |
|  |  | (2.0092) | (2.0648) | (1.7823) |  | (2.0401) | (2.1031) | (1.8552) |  | (2.0248) | (2.0789) | (1.7815) |
| *CV* | Yes | Yes | Yes | Yes | Yes | Yes | Yes | Yes | Yes | Yes | Yes | Yes |
| *Year/Industry* | Yes | Yes | Yes | Yes | Yes | Yes | Yes | Yes | Yes | Yes | Yes | Yes |
| *Constant* | -0.0333 | -1.4765*** | -1.7435*** | -2.0286*** | -0.0391 | -1.5599*** | -1.8643*** | -2.2884*** | -0.0391 | -1.6569*** | -1.9965*** | -2.5342*** |
|  | (-0.5938) | (-5.3884) | (-5.5176) | (-5.2792) | (-0.6950) | (-5.6904) | (-5.8949) | (-5.9479) | (-0.6927) | (-6.0708) | (-6.3409) | (-6.6281) |
| *N* | 18,369 | 18,369 | 18,369 | 18,369 | 18,369 | 18,369 | 18,369 | 18,369 | 18,369 | 18,369 | 18,369 | 18,369 |
| *R2* | 0.1574 | 0.1084 | 0.1238 | 0.2150 | 0.1573 | 0.1077 | 0.1229 | 0.2138 | 0.1574 | 0.1058 | 0.1204 | 0.2103 |
| ***Note:*** *This table reports of mechanism examination of digital finance/fintech to financial statement comparability. The potential mechanism is, improving accounting. The dependent variable is financial statement comparability taken from the model developed by Francis et al. (2014). The independent variable Columns (1)–(3), (4)–(6), and (7)–(9), are total digital finance index (DFI), breath of coverage index (DF_BC), and depth of usage index (DF_DU), respectively. Accounting quality is taken from the model developed by Kothari et al. (2005). T-values are shown in brackets. ***, **, and * represent significance at 1%, 5%, and 10%, respectively. Please refer to Appendix A for definitions of variables.* | | | | | | | | | | | | |

| **Table 7 Additional studies** | | | | | | | | | |
| --- | --- | --- | --- | --- | --- | --- | --- | --- | --- |
| **Panel A: Digital finance, economic policy uncertainty, and financial statement comparability** | | | | | | | | | |
|  | **(1)** | **(2)** | **(3)** | **(4)** | **(5)** | **(6)** | **(7)** | **(8)** | **(9)** |
| **VARIABLES** | **FSC4** | **FSC10** | **FSCInd** | **FSC4** | **FSC10** | **FSCInd** | **FSC4** | **FSC10** | **FSCInd** |
| *DFI* | 0.0052*** | 0.0077*** | 0.0205*** |  |  |  |  |  |  |
|  | (15.6390) | (19.8491) | (42.5631) |  |  |  |  |  |  |
| *EPU* | -0.0044*** | -0.0064*** | -0.0199*** | -0.0039*** | -0.0056*** | -0.0181*** | -0.0027*** | -0.0039*** | -0.0133*** |
|  | (-6.2890) | (-7.8440) | (-20.1181) | (-6.0279) | (-7.5895) | (-20.1814) | (-4.2386) | (-5.2356) | (-14.5984) |
| *DFI_EPU* | -0.0001*** | -0.0002*** | -0.0001*** |  |  |  |  |  |  |
|  | (-7.1843) | (-9.0372) | (-22.4641) |  |  |  |  |  |  |
| *DFI_BC* |  |  |  | 0.0050*** | 0.0074*** | 0.0198*** |  |  |  |
|  |  |  |  | (16.4915) | (21.1189) | (46.0601) |  |  |  |
| *DFI_BC_EPU* |  |  |  | -0.0001*** | -0.0002*** | -0.0001*** |  |  |  |
|  |  |  |  | (-7.3909) | (-9.4057) | (-23.9169) |  |  |  |
| *DFI_DU* |  |  |  |  |  |  | 0.0044*** | 0.0066*** | 0.0181*** |
|  |  |  |  |  |  |  | (13.2173) | (17.0018) | (37.5098) |
| *DIF_DU_EPU* |  |  |  |  |  |  | -0.0001*** | -0.0001*** | -0.0001*** |
|  |  |  |  |  |  |  | (-4.8935) | (-6.1624) | (-16.5967) |
| *CV* | Yes | Yes | Yes | Yes | Yes | Yes | Yes | Yes | Yes |
| *Year/Industry* | Yes | Yes | Yes | Yes | Yes | Yes | Yes | Yes | Yes |
| *Constant* | -2.2384*** | -2.8414*** | -5.4900*** | -2.2781*** | -2.9076*** | -5.6723*** | -2.2235*** | -2.8105*** | -5.3072*** |
|  | (-6.9592) | (-7.6858) | (-12.4293) | (-7.1309) | (-7.9188) | (-12.9481) | (-6.9217) | (-7.6093) | (-11.9941) |
| *N* | 18,369 | 18,369 | 18,369 | 18,369 | 18,369 | 18,369 | 18,369 | 18,369 | 18,369 |
| *R2* | 0.1116 | 0.1290 | 0.2408 | 0.1116 | 0.1293 | 0.2446 | 0.1073 | 0.1229 | 0.2253 |
| **Panel B: Digital finance, media coverage, and financial statement comparability** | | | | | | | | | |
| **High media coverage** | | | | | | | | | |
|  | **(1)** | **(2)** | **(3)** | **(4)** | **(5)** | **(6)** | **(7)** | **(8)** | **(9)** |
| **VARIABLES** | **FSC4** | **FSC10** | **FSCInd** | **FSC4** | **FSC10** | **FSCInd** | **FSC4** | **FSC10** | **FSCInd** |
| *DFI* | 0.0020*** | 0.0029*** | 0.0048*** |  |  |  |  |  |  |
|  | (2.7763) | (3.4863) | (4.6625) |  |  |  |  |  |  |
| *DFI_BC* |  |  |  | 0.0020*** | 0.0029*** | 0.0072*** |  |  |  |
|  |  |  |  | (13.1364) | (16.8194) | (33.2623) |  |  |  |
| *DFI_DU* |  |  |  |  |  |  | 0.0022*** | 0.0033*** | 0.0085*** |
|  |  |  |  |  |  |  | (12.1129) | (15.6914) | (32.2429) |
| *CV* | Yes | Yes | Yes | Yes | Yes | Yes | Yes | Yes | Yes |
| *Year/Industry* | Yes | Yes | Yes | Yes | Yes | Yes | Yes | Yes | Yes |
| *Constant* | -10.4787 | -17.6030 | -188.7920*** | -1.4115*** | -1.7085*** | -2.0384*** | -1.5227*** | -1.8588*** | -2.2926*** |
|  | (-0.2464) | (-0.3546) | (-3.0886) | (-4.2884) | (-4.5099) | (-4.3730) | (-4.6443) | (-4.9215) | (-4.9322) |
| *N* | 8,998 | 8,998 | 8,998 | 8,998 | 8,998 | 8,998 | 8,998 | 8,998 | 8,998 |
| *R2* | 0.0922 | 0.1106 | 0.2126 | 0.0919 | 0.1101 | 0.2110 | 0.0887 | 0.1058 | 0.2050 |
| **Low media coverage** | | | | | | | | | |
|  | **(1)** | **(2)** | **(3)** | **(4)** | **(5)** | **(6)** | **(7)** | **(8)** | **(9)** |
| **VARIABLES** | **FSC4** | **FSC10** | **FSCInd** | **FSC4** | **FSC10** | **FSCInd** | **FSC4** | **FSC10** | **FSCInd** |
| *DFI* | 0.0007 | 0.0006 | -0.0001 |  |  |  |  |  |  |
|  | (0.5323) | (0.3951) | (-0.0397) |  |  |  |  |  |  |
| *DIF_BC* |  |  |  | 0.0007 | 0.0006 | -0.0001 |  |  |  |
|  |  |  |  | (0.5785) | (0.3827) | (-0.0587) |  |  |  |
| *DFI_DU* |  |  |  |  |  |  | 0.0003 | 0.0004 | 0.0001 |
|  |  |  |  |  |  |  | (0.3777) | (0.3924) | (0.0950) |
| *CV* | Yes | Yes | Yes | Yes | Yes | Yes | Yes | Yes | Yes |
| *Year/Industry* | Yes | Yes | Yes | Yes | Yes | Yes | Yes | Yes | Yes |
| *Constant* | -4.1437* | -6.0933** | -13.2149*** | -3.9425* | -6.0646** | -13.3132*** | -4.7727*** | -6.4853*** | -12.8566*** |
|  | (-1.9347) | (-2.4273) | (-3.4030) | (-1.7122) | (-2.2947) | (-3.0937) | (-3.3849) | (-3.9988) | (-5.4939) |
| *N* | 9,371 | 9,371 | 9,371 | 9,371 | 9,371 | 9,371 | 9,371 | 9,371 | 9,371 |
| *R2* | 0.1387 | 0.1551 | 0.2691 | 0.1387 | 0.1551 | 0.2691 | 0.1387 | 0.1551 | 0.2691 |
| **Panel C: Digital finance, analysts following, and financial statement comparability** | | | | | | | | | |
| **High Analysts forecast** | | | | | | | | | |
|  | **(1)** | **(2)** | **(3)** | **(4)** | **(5)** | **(6)** | **(7)** | **(8)** | **(9)** |
| **VARIABLES** | **FSC4** | **FSC10** | **FSCInd** | **FSC4** | **FSC10** | **FSCInd** | **FSC4** | **FSC10** | **FSCInd** |
| *DFI* | 0.0025*** | 0.0037*** | 0.0089*** |  |  |  |  |  |  |
|  | (18.0795) | (22.6352) | (40.6059) |  |  |  |  |  |  |
| *DFI_BC* |  |  |  | 0.0023*** | 0.0034*** | 0.0082*** |  |  |  |
|  |  |  |  | (18.3805) | (22.9845) | (41.6497) |  |  |  |
| *DFI_DU* |  |  |  |  |  |  | 0.0027*** | 0.0040*** | 0.0099*** |
|  |  |  |  |  |  |  | (18.1774) | (22.7529) | (41.2440) |
| *Year/Industry* | Yes | Yes | Yes | Yes | Yes | Yes | Yes | Yes | Yes |
| *Constant* | -1.3786*** | -1.5636*** | -1.4431** | -1.4489*** | -1.6681*** | -1.6709*** | -1.5353*** | -1.7944*** | -1.9419*** |
|  | (-3.4294) | (-3.3135) | (-2.4674) | (-3.6035) | (-3.5338) | (-2.8547) | (-3.8338) | (-3.8161) | (-3.3397) |
| *N* | 8,544 | 8,544 | 8,544 | 8,544 | 8,544 | 8,544 | 8,544 | 8,544 | 8,544 |
| *R2* | 0.0810 | 0.1048 | 0.2343 | 0.0805 | 0.1041 | 0.2343 | 0.0792 | 0.1022 | 0.2320 |
| **Low Analysts forecast** | | | | | | | | | |
|  | **(1)** | **(2)** | **(3)** | **(4)** | **(5)** | **(6)** | **(7)** | **(8)** | **(9)** |
| **VARIABLES** | **FSC4** | **FSC10** | **FSCInd** | **FSC4** | **FSC10** | **FSCInd** | **FSC4** | **FSC10** | **FSCInd** |
| *DFI* | 0.0001 | 0.0005 | 0.0005 |  |  |  |  |  |  |
|  | (0.0452) | (0.3414) | (0.2284) |  |  |  |  |  |  |
| *DFI_BC* |  |  |  | 0.0004 | 0.0014 | 0.0021 |  |  |  |
|  |  |  |  | (0.2992) | (0.8272) | (0.8137) |  |  |  |
| *DFI_DU* |  |  |  |  |  |  | 0.0003 | 0.0002 | 0.0004 |
|  |  |  |  |  |  |  | (0.4235) | (0.2569) | (0.3026) |
| *CV* | Yes | Yes | Yes | Yes | Yes | Yes | Yes | Yes | Yes |
| *Year/Industry* | Yes | Yes | Yes | Yes | Yes | Yes | Yes | Yes | Yes |
| *Constant* | -4.4936** | -7.1468*** | -13.4337*** | -5.3325** | -8.7508*** | -16.2778*** | -4.1199*** | -6.0488*** | -12.0575*** |
|  | (-2.3006) | (-3.1092) | (-3.8011) | (-2.1440) | (-3.0655) | (-3.6409) | (-3.3504) | (-4.2388) | (-5.8201) |
| *N* | 9,707 | 9,707 | 9,707 | 9,707 | 9,707 | 9,707 | 9,707 | 9,707 | 9,707 |
| *R2* | 0.1424 | 0.1572 | 0.2554 | 0.1424 | 0.1573 | 0.2554 | 0.1424 | 0.1572 | 0.2554 |
| **Panel D: SOEs vs NSOEs** | | | | | | | | | |
| **State owned firms** | | | | | | | | | |
|  |  |  |  |  |  |  |  |  |  |
|  | **(1)** | **(2)** | **(3)** | **(4)** | **(5)** | **(6)** | **(7)** | **(8)** | **(9)** |
| **VARIABLES** | **FSC4** | **FSC10** | **FSCInd** | **FSC4** | **FSC10** | **FSCInd** | **FSC4** | **FSC10** | **FSCInd** |
| *DFI* | 0.0016 | 0.0019 | 0.0015 |  |  |  |  |  |  |
|  | (0.9547) | (0.9794) | (0.5084) |  |  |  |  |  |  |
| *DFI_BC* |  |  |  | 0.0007 | 0.0006 | -0.0006 |  |  |  |
|  |  |  |  | (0.3478) | (0.2804) | (-0.1797) |  |  |  |
| *DFI_DU* |  |  |  |  |  |  | 0.0009 | 0.0012 | 0.0010 |
|  |  |  |  |  |  |  | (0.8054) | (0.9443) | (0.5614) |
| *CV* | Yes | Yes | Yes | Yes | Yes | Yes | Yes | Yes | Yes |
| *Year/Industry* | Yes | Yes | Yes | Yes | Yes | Yes | Yes | Yes | Yes |
| *Constant* | -1.4358 | -2.5995 | -9.1246* | -3.0115 | -4.7575 | -12.6888** | -2.8802 | -4.0989** | -10.1393*** |
|  | (-0.4892) | (-0.7761) | (-1.8374) | (-0.8661) | (-1.2126) | (-2.1663) | (-1.6431) | (-2.0832) | (-3.6563) |
| *N* | 8,222 | 8,222 | 8,222 | 8,222 | 8,222 | 8,222 | 8,222 | 8,222 | 8,222 |
| *R2* | 0.1472 | 0.1581 | 0.2498 | 0.1472 | 0.1580 | 0.2498 | 0.1472 | 0.1581 | 0.2498 |
| **Non - state owned firms** | | | | | | | | | |
|  | **(1)** | **(2)** | **(3)** | **(4)** | **(5)** | **(6)** | **(7)** | **(8)** | **(9)** |
| **VARIABLES** | **FSC4** | **FSC10** | **FSCInd** | **FSC4** | **FSC10** | **FSCInd** | **FSC4** | **FSC10** | **FSCInd** |
| *DFI* | 0.0025*** | 0.0037*** | 0.0065*** |  |  |  |  |  |  |
|  | (3.2237) | (4.1394) | (5.8436) |  |  |  |  |  |  |
| *DFI_BC* |  |  |  | 0.0028*** | 0.0041*** | 0.0055*** |  |  |  |
|  |  |  |  | (2.6873) | (3.3860) | (3.6007) |  |  |  |
| *DFI_DU* |  |  |  |  |  |  | 0.0029*** | 0.0041*** | 0.0099*** |
|  |  |  |  |  |  |  | (15.4819) | (19.1015) | (36.5606) |
| *CV* | Yes | Yes | Yes | Yes | Yes | Yes | Yes | Yes | Yes |
| *Year/Industry* | Yes | Yes | Yes | Yes | Yes | Yes | Yes | Yes | Yes |
| *Constant* | -21.3549 | -18.1311 | -166.4502*** | 16.9924 | 35.2024 | -184.4827* | -1.4419*** | -1.7209*** | -2.0889*** |
|  | (-0.5070) | (-0.3689) | (-2.7094) | (0.2618) | (0.4630) | (-1.9227) | (-5.0026) | (-5.1348) | (-4.8516) |
| *N* | 10,147 | 10,147 | 10,147 | 10,147 | 10,147 | 10,147 | 10,147 | 10,147 | 10,147 |
| R2 | 0.0955 | 0.1187 | 0.2423 | 0.0948 | 0.1175 | 0.2391 | 0.0889 | 0.1100 | 0.2324 |
| ***Note:*** *This table reports the results on the effect of digital finance/fintech on FS comparability using additional variables. Panel A reports the OLS regression results on the moderating effect of economic policy uncertainty on the association between digital finance/fintech and comparability. Panel B reports the OLS regression results on the effect of digital finance/fintech on comparability in high and low media coverage (used as external governance variable). Panel C reports the OLS regression results on the effect of digital finance/fintech on comparability in high and low analysts’ coverage (used as the external governance variable. Panel D reports the OLS regression results on the effect of digital finance/fintech on comparability in state and non-state-owned firms. t-values are shown in brackets. ***, **, and * represent significance at 1%, 5%, and 10%, respectively. Please refer to Appendix A for definitions of variables.* | | | | | | | | | |

| **Appendix A: Variable definitions** | |
| --- | --- |
| **Variables** | **Details** |
| **Dependent variables:** | |
| FSC4 | FSC4 is the mean of the four highest comparability scores of firm “i” in period “t” in the same industry |
| FSC10 | FSC10 is the mean of the comparability scores of the top 10 firm within the industry. |
| FSCInd | FSCInd is the median of all of the comparability scores of firm “i” in the industry for period “t”. |
| **Independent variables:** | |
| DFI | Digital Finance Index: Overall digital index, taken from PKU-DFIIC (*https://www.idf.pku. edu.cn/).* |
| DFI_BC | Breath of Coverage: Breath of coverage of the digital finance/fintech index, obtained from PKU-DFIIC. |
| DFI_DU | Depth of Usage: Depth of use of the digital finance/fintech index, obtained from PKU-DFIIC |
| **Control variables:** | |
| *Size* | Size: Total assets (in natural logarithm). |
| *Lev* | Leverage: Total liability divided by total assets |
| *OFC* | Operating Cashflow: Operating cash flows deflated by total assets. |
| *ROA* | Return on Assets: Net income divided by total assets. |
| *SG* | Sales Growth: Annual sales growth |
| *FRQ* | Reporting Quality: Absolute value of discretionary accruals calculated using the Dechow and Dichev (2002) model. |
| *CI* | Capital Intensity: It is measured by dividing fixed assets by sales. |
| *AGE* | Log of number of years since the listing. |
| *MTB* | Ratio of market value of equity to book value of equity. |
| *RETV* | Standard deviation of daily stock returns |
| *Big4* | Big4: Equals 1 if the auditor is from one of the Big 4 firms (auditing), otherwise 0. |
| *SOE* | Indicator variable that equals one for state-owned firm, otherwise zero |
| **Additional variables:** | |
| *Media coverage* | MC The dummy variable MC (i.e., the number of reports on the firm over the year) holds the value of one if the value is greater than the industry median, otherwise zero |
| *Analysts Forecast* | AF The indicator variable AF (i.e., the number of unique analysts covering a particular firm each year) takes the value of one if AF is greater than the industry median, otherwise zero |
| *Economic Policy Uncertainty* | EPU Uncertainty is measured using monthly (averaged yearly) economic policy uncertainty from the model developed by Baker et al. (2016 |

**Appendix B: Mediator variable: Accounting quality**

Following Kothari et al. (2005), we also employed financial reporting quality (FRQ) measurement to explore the reporting quality channel. As it is a multi-dimensional concept, there have been several definitions of accounting earnings quality in the literature. In the literature, there are two categories of earnings attributes usually employed to measure FRQ: the so-called market-based attributes (value relevance, conservatism, timelines) and the accounting-based attributes (quality of accrual) (Francis et al., 2005). In this study, the accounting-based attributes are used as a proxy for FRQ as it is more advantageous to use this method rather than other methods. The accounting-based attribute (accrual quality) puts a focus on the precision issue of accounting information. As a result, it may provide useful information on firms’ performance and operations. Building on this argument, Dechow et al. (1995) argue that accrual quality may act as a useful measure of FRQ. Accruals have an important role to play in dealing with problems of measuring financial performance – an issue that is easily and all the more likely to be manipulated when accruals rise (Beneish, 1999). In this paper, Kothari et al.’s (2005) model – a reliable and common approach to measuring FRQ is utilized (Chen et al., 2011; Jiang & Chen, 2019; Trinh et al., 2022).

Based on Kothari et al. (2005), the following model for measurement of performance-adjusted discretionary accruals is used:

, (7)

where stands for total accruals in the current year which is calculated as thethe change in non-cash current assets minus the change in non-interest-bearing liabilities, then minus depreciation for firm *i* at year *t*, before being divided by total assets of the year before. stands for changes in sales revenues divided by total assets of the previous year. stands for firm’s net property, plant, and equipment scaled by the lag value of total assets. denotes return on assets of firm *i* at year *t*. Then we obtain discretionary accruals as residuals extracted from the model. Following Chen et al. (2011), we also take the absolute value of discretionary accruals to use as a proxy for FRQ. In the final step, to make it easy to interpret, the absolute value of discretionary accurals is multiplied by (-1) (which is denoted by *FRQ*) which implies that higher values indicate higher FRQ.
